# Supplementary material
Source: PubMed Central journal article supplement (PMC4337808)
Supplement: NIHMS629331-supplement-Online_Resource_2.pdf [file NIHMS629331-supplement-Online_Resource_2.pdf]

Date

Mailing Address

Dear :

We recently completed your cystic fibrosis (CF) carrier test. Your results showed that you are a carrier of a genetic change in one of your copies of the CF gene.

As we discussed in our earlier mailing, everyone has two copies of the CF gene. Individuals with cystic fibrosis have genetic changes (called *mutations*) in both copies of their CF gene. *Carriers* of CF have a mutation in only one copy of their CF gene; because their other gene is unchanged, they are healthy and have no signs of the disease. If your spouse is also a carrier, each of your future children has a 1 in 4 (25%) chance of inheriting the change from both of you and developing cystic fibrosis, and each of your children has a 1 in 2 chance (50%) of also being a carrier. If your spouse is not a carrier, the risk is nearly zero that you will have a child with cystic fibrosis. Although there is a very small chance that an error in our lab caused your positive result, we consider this to be very unlikely.

If your spouse has not been tested and you are planning to have children in the future, we can help you make arrangements for carrier testing in our lab or we can refer you to a clinic in Sioux Falls. If you are not planning to have children, but have adult children, 18 years of age or older, who would like to be tested, we can also make arrangements for carrier testing in our lab, or we can refer them to a clinic for testing. Please contact me by mail or phone if you would like to discuss this further.

If you have any questions about these results, please contact me by mail or phone at (XXX)-XXX-XXXX. Thank you for participating in our study and I look forward to seeing you again soon.

Sincerely,

**Your results for the two known Hutterite cystic fibrosis genetic changes:**

| TEST      | RESULTS                      |
|-----------|------------------------------|
| deltaF508 | Carrier (or "Not a carrier") |
| M1101K    | Not a carrier (or "Carrier") |

F: XXXXXX  
BD: XX/XX/XXXX
